# Supplementary material for: Yeast lsm Pro-Apoptotic Mutants Show Defects in Autophagy Induction
Source: Preprints.org preprint supplement (doi:10.20944/preprints202307.1337.v1), 2023-07-20
Supplement: Supplementary file 1 [file supplementary]

**A B**

**
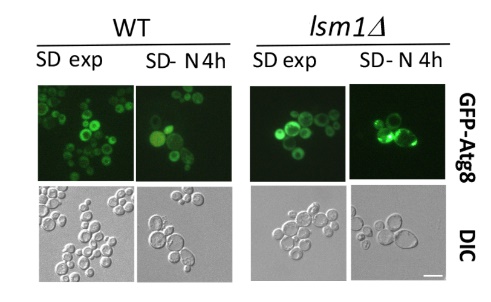

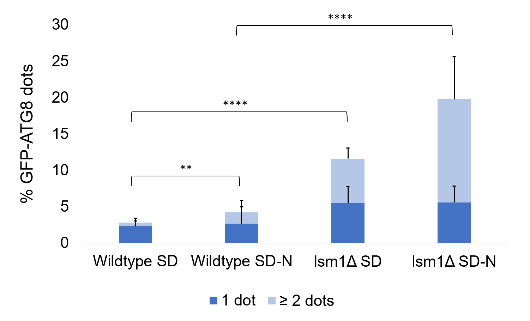
**

**C D**

**
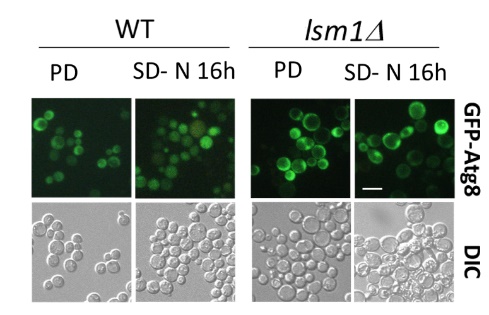

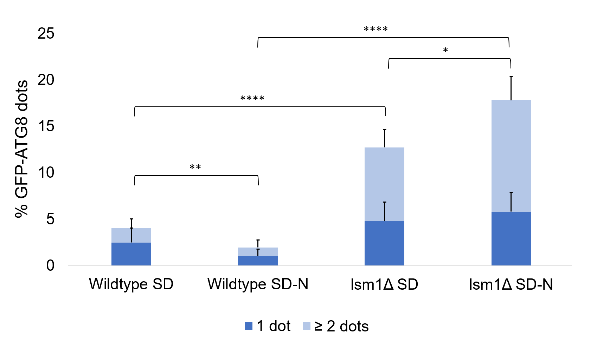
**

**E F**

**
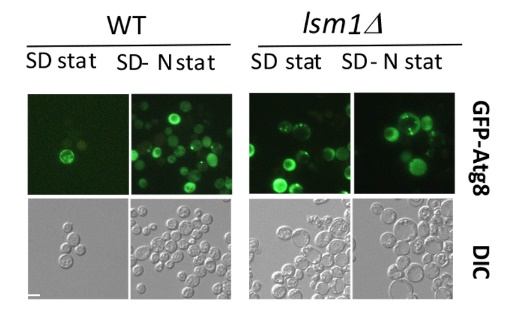

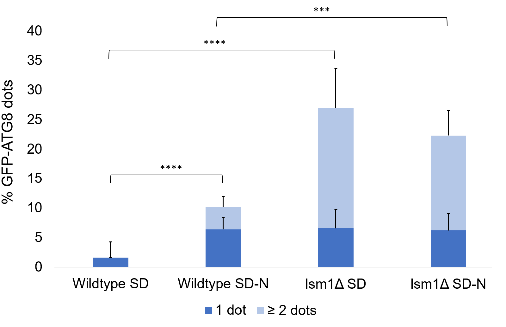
**

**Figure S1.** *Lsm1Δ* mutant shows defects in autophagy-related structures transport to the vacuole, as indicated by a higher percentage of GFP-ATG8 dots in the cytoplasm during nitrogen starvation and CLS.Wild type BMA38 and mutant *lsm1Δ* cells expressing the fusion protein GFP-ATG8 were observed at the fluorescence microscope during exponential phase in both SD and SD-N medium for 4h (A), during post diauxic phase (PD) and in SD-N for 16h (C) and after 3 days of growth in SD (SD stat) or SD-N (SD-N stat) (E). GFP-Atg8 dots per cell were quantified from three biological replicates (n ≥ 300 cells), and the mean of cells containing one or ≥2 dots was plotted in (B), (D) and (F). Error bars represent standard deviation. *p-value<0.05 **p-value<0.01 ***p-value<0.001 ****p-value<0.0001
